# Supplementary material for: Sirtinol promotes PEPCK1 degradation and inhibits gluconeogenesis by inhibiting deacetylase SIRT2
Source: PubMed Central journal article supplement (PMC5428341; doi:10.1038/s41598-017-00035-9), 2017-02-28
Supplement: 41598_2017_35_MOESM1_ESM.pdf [file 41598_2017_35_MOESM1_ESM.pdf]

**Sirtinol promotes PEPCK1 degradation and inhibits gluconeogenesis by  
inhibiting deacetylase SIRT2**

Mingming Zhang<sup>1,2,#</sup>, Yida Pan<sup>2,#</sup>, Robert G Dorfman<sup>3</sup>, Yuyao Yin<sup>1</sup>, Qian Zhou<sup>4</sup>, Shan Huang<sup>5</sup>, Jie Liu<sup>2,\*</sup>, Shimin Zhao<sup>4,\*</sup>

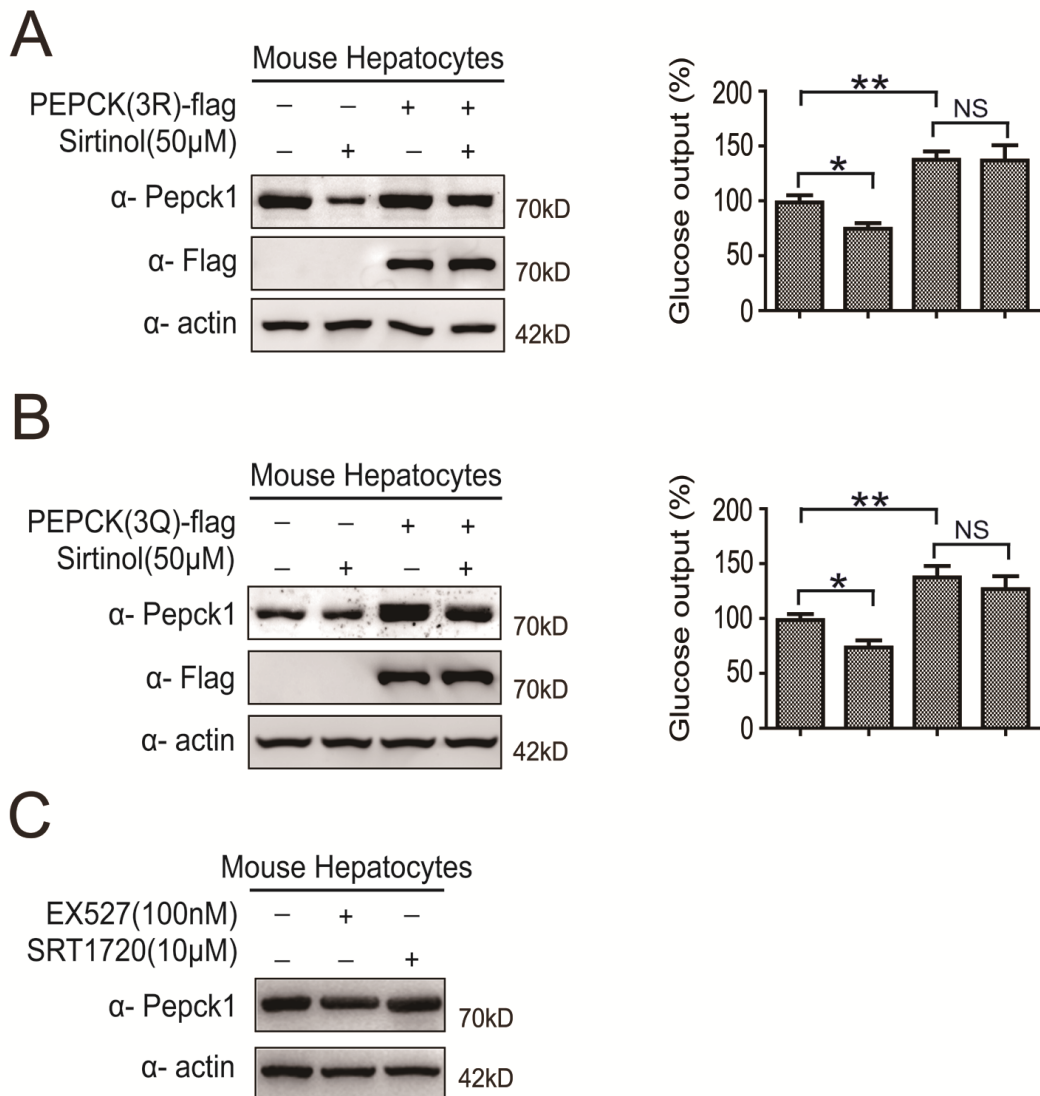

Supplementary Figure.

- 
- (A) Primary mice hepatocytes were transfected with flag tagged mutant PEPCCK1(3K/R) plasmid, as well as treated with 50  $\mu$ M sirtinol for 4 hours. Cells were harvested and visualized by Western blotting (left). Culture medium was collected and the glucose concentration was measured (right).
- (B) Primary mice hepatocytes were transfected with flag tagged mutant PEPCCK1(3K/Q) plasmid, as well as treated with 50  $\mu$ M sirtinol for 4 hours. Cells were harvested and visualized by Western blotting (left). Culture medium was collected and the glucose concentration was measured (right).
- (C) Primary mice hepatocytes were treated with 100nM EX527 or 10 $\mu$ M SRT1720 for 4 hours. Cells were harvested and visualized by Western blotting.
